# Supplementary material for: Effect of Lactic Acid Fermentation on Color, Phenolic Compounds and Antioxidant Activity in African Nightshade
Source: PubMed Central journal article supplement (PMC7564239; doi:10.3390/microorganisms8091324), 2020-08-30
Supplement: microorganisms-08-01324-s001.pdf [file microorganisms-08-01324-s001.pdf]

Supplementary Table 1 Pearson's correlation coefficients of phenolic profiles and antioxidant (FRAP) activities

|                                 | Correlation co-efficient |
|---------------------------------|--------------------------|
|                                 | FRAP                     |
| Total polyphenols               | <b>0.82</b>              |
| Gallic acid                     | 0.645                    |
| Catechin.                       | 0.541                    |
| Caffeic acid                    | -0.343                   |
| Vanillic                        | <b>0.726</b>             |
| 2.4<br>Dihydroxybenzoic<br>acid | -0.134                   |
| Coumaric                        | <b>0.868</b>             |
| Ferulic                         | 0.459                    |
| Ellagic                         | -0.842                   |
| Quercetin                       | 0.091                    |
| Luteolin                        | 0.510                    |

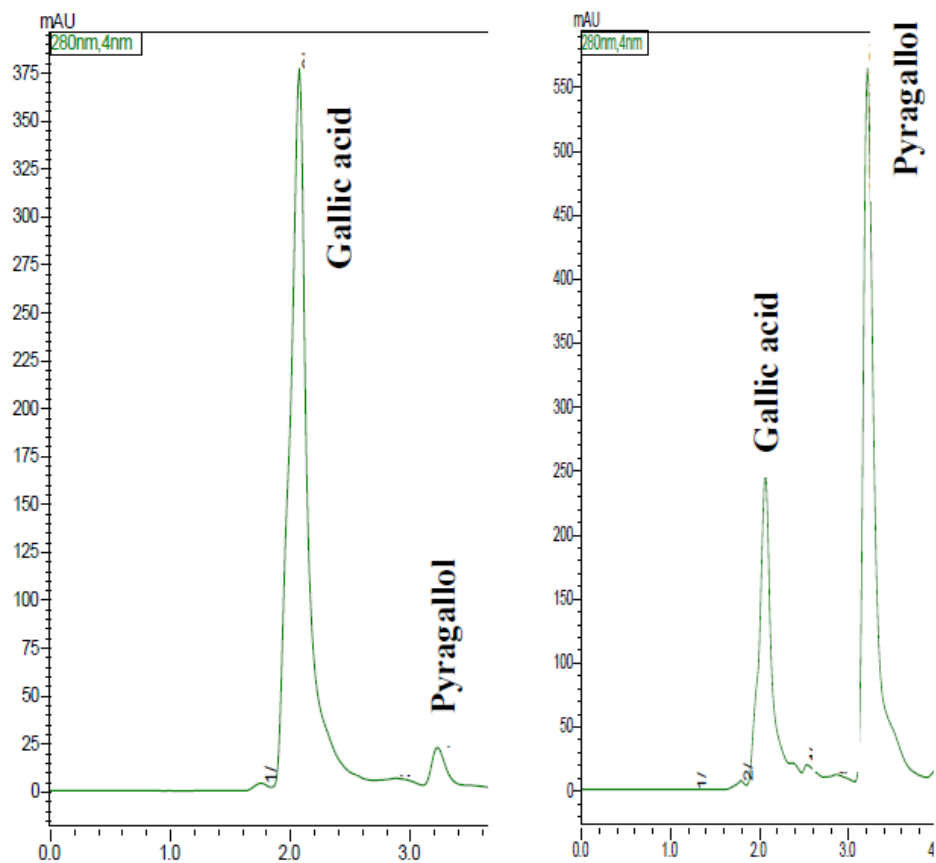

Supplementary Fig. 1 Chromatogram showing the changes in gallic acid concentration and pyragallol during fermentation by *Weissella cibaria* (strain 21) and *Lactobacillus plantarum* (strain 75)
